# Supplementary material
Source: publisher figshare collection journal article supplement (https://frontiersin.figshare.com/ndownloader/files/34871301)
Supplement: Supplementary file [file 34871301]

## Questions to the gamebird farm manager

|                                                                                                                                                                                                                                                     |
|-----------------------------------------------------------------------------------------------------------------------------------------------------------------------------------------------------------------------------------------------------|
| What percentages of gamebird eggs imported from other member states? (According to Defra's document in 2006, 50% are imported).                                                                                                                     |
| When are the egg importations most likely occur?                                                                                                                                                                                                    |
| Do gamebird hatcheries usually accept eggs from different source farms?<br>Or mainly from their own laying sites?                                                                                                                                   |
| Are eggs from different sources separated? (Is each egg traceable to its source farm?)                                                                                                                                                              |
| What is the typical structure of the gamebird farm? In other words, how many different sites (pens) do they usually have within the same operators?<br>e.g. laying site, hatching site (hatchery), (brooding site?), rearing site, releasing site.. |
| Are a hatchery and rearing sites usually in separate locations?                                                                                                                                                                                     |
| What is a typical housing system for these sites (outside only, inside with access to outside, inside only)?                                                                                                                                        |
| Is an outside enclosure usually netted?                                                                                                                                                                                                             |
| When are birds usually released in the wild?                                                                                                                                                                                                        |
| When are birds usually captured?                                                                                                                                                                                                                    |
| How are the birds captured from the wild?                                                                                                                                                                                                           |
| What percentages of gamebird farms in GB recapture released birds, and what percentages of farms keep birds overwintered?                                                                                                                           |
| Are there many farms do both overwintering and recapturing?                                                                                                                                                                                         |
| What is a typical enclosure for the birds over-wintered for breeding (outdoor enclosure or indoor cages)?                                                                                                                                           |
| What is a typical enclosure for the birds for breeding (outdoor enclosure or indoor cages)?                                                                                                                                                         |
| Are eggs collected from the laying site every day? If not, how often?                                                                                                                                                                               |
| Are there any farms keeping eggs with hens instead of using hatcheries?                                                                                                                                                                             |
